# Supplementary material
Source: PubMed Central journal article supplement (PMC5738039)
Supplement: NIHMS926355-supplement-Supplement.pdf [file NIHMS926355-supplement-Supplement.pdf]

Supporting Information for  
“Param-Medic Breathes New Life into MS/MS Database Search by  
Optimizing Parameter Settings”

Damon H. May<sup>1</sup>, Kaipo Tamura<sup>1</sup>, and William S. Noble<sup>1,2</sup>

<sup>1</sup>Department of Genome Sciences, University of Washington

<sup>2</sup>Department of Computer Science and Engineering, University of Washington

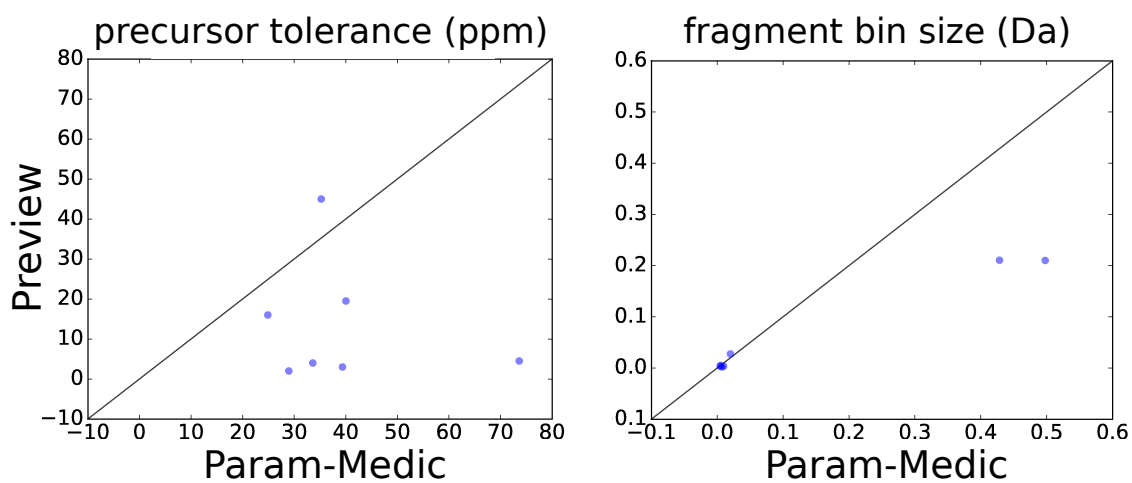

Figure 1: **Comparing parameter estimates from Param-Medic and Preview.** Scatter plots of parameter values estimated by Param-Medic (horizontal axis) and Preview (vertical axis) on all nine training and test experiments for which both tools returned values. Solid line represents 1:1 correspondence. Left: precursor error,  $r = -0.20$ . Right: fragment bin size, correlation coefficient  $r = 0.99$ . The fragment bin size estimates show high correlation ( $r = 0.99$ ), though this value is largely driven by two outlier datasets. The precursor tolerance estimates are essentially uncorrelated ( $r = -0.20$ ).
